# Supplementary material for: An Immunodeficiency Disease withRAGMutations and Granulomas
Source: Atypon-hosted journal article supplement (doi:10.1056/nejmoa073966), 2008-05-07
Supplement: nejm_schuetz_2030sa1.pdf [file nejm_schuetz_2030sa1.pdf]

## Supplementary Appendix

This appendix has been provided by the authors to give readers additional information about their work.

Supplement to: Schuetz C, Huck K, Gudowius S, et al. An immunodeficiency disease with RAG mutations and granulomas. *N Engl J Med* 2008;358:2030-8.

**Supplementary Table 1:** Immunophenotyping and T-cell clonality of the granulomatous lesions

|                                | Patient 1<br>(compound heterozygeous<br>RAG1 mutation) | Patient 2<br>(compound heterozygeous<br>RAG1 mutation) | Patient 3<br>(compound heterozygeous<br>RAG2 mutation) |
|--------------------------------|--------------------------------------------------------|--------------------------------------------------------|--------------------------------------------------------|
| <b>Lymphocytes</b>             |                                                        |                                                        |                                                        |
| T cells (CD3)                  | +                                                      | +                                                      | +                                                      |
| CD4                            | -                                                      | -                                                      | -                                                      |
| CD8                            | +                                                      | +                                                      | +                                                      |
| clonality*                     | monoclonal                                             | polyclonal                                             | polyclonal                                             |
| B cells (CD79a)                | -                                                      | -                                                      | -                                                      |
| <b>Epitheloid cells (CD68)</b> | +                                                      | +                                                      | +                                                      |

\* TCR- $\gamma$  gene rearrangements by semi-nested multiplex PCR

**Supplemental Table 2.** Overview of pathogen search in biopsy materials and blood (staining, culture, PCR, electron microscopy, serology)

| <b>Tests in biopsy material</b>               | <i>Patient 1</i>                                        | <i>Patient 2</i>                             |                 | <i>Patient 3</i>                          |                    |
|-----------------------------------------------|---------------------------------------------------------|----------------------------------------------|-----------------|-------------------------------------------|--------------------|
|                                               | <b>skin</b>                                             | <b>skin</b>                                  | <b>lung/BAL</b> | <b>spleen</b>                             | <b>BAL</b>         |
| <i>staining</i>                               |                                                         |                                              |                 |                                           |                    |
| Gram stain                                    | negative                                                | negative                                     | negative        | negative                                  | negative           |
| Ziehl-Neelsen/Auramin staining (mycobacteria) | negative                                                | negative                                     | negative        | negative                                  | negative           |
| PAS/Grokott (fungi)                           | negative                                                | negative                                     | negative        | negative                                  | negative           |
| Whartin-Starry (spirochetes, bartonella)      | n.d.                                                    | negative                                     | n.d.            | n.d.                                      | n.d.               |
| <i>culture</i>                                |                                                         |                                              |                 |                                           |                    |
| bacterial culture                             | negative                                                | negative                                     | n.d.            | negative                                  | negative           |
| M. tuberculosis                               | negative                                                | negative                                     | n.d.            | negative                                  | negative           |
| <i>PCR</i>                                    |                                                         |                                              |                 |                                           |                    |
| M. tuberculosis                               | negative                                                | negative                                     | negative        | negative                                  | negative           |
| Atypical mycobacteria                         | n.d.                                                    | negative                                     | n.d.            | n.d.                                      | n.d.               |
| Trophoeryema whippelii                        | negative                                                | negative                                     | n.d.            | negative                                  | n.d.               |
| Leishmania                                    | n.d.                                                    | negative                                     | n.d.            | n.d.                                      | n.d.               |
| Bartonella quintana und henselae              | n.d.                                                    | negative                                     | n.d.            | n.d.                                      | n.d.               |
| Mycoplasma pneum.                             | n.d.                                                    | n.d.                                         | n.d.            | n.d.                                      | negative           |
| Chlamydia pneum.                              | n.d.                                                    | n.d.                                         | negative        | n.d.                                      | negative           |
| Legionella pneumoph.                          | n.d.                                                    | n.d.                                         | negative        | n.d.                                      | negative           |
| Pneumocystis carinii                          | n.d.                                                    | n.d.                                         | negative        | n.d.                                      | n.d.               |
| HSV-1                                         | n.d.                                                    | negative                                     | negative        | n.d.                                      | n.d.               |
| VZV                                           | n.d.                                                    | negative                                     | n.d.            | n.d.                                      | n.d.               |
| CMV                                           | n.d.                                                    | negative                                     | negative        | negative                                  | negative           |
| HHV-6                                         | n.d.                                                    | n.d.                                         | negative        | negative                                  | negative           |
| Parvovirus B19                                | n.d.                                                    | n.d.                                         | negative        | negative                                  | negative           |
| Adenovirus                                    | n.d.                                                    | n.d.                                         | negative        | negative                                  | negative           |
| EBV                                           | n.d.                                                    | n.d.                                         | negative        | 239 K/ $\mu$ g DNA                        | 405 K/ $\mu$ g DNA |
| Parapox virus                                 | n.d.                                                    | negative                                     | n.d.            | n.d.                                      | n.d.               |
| <i>Electron microscopy</i>                    |                                                         |                                              |                 |                                           |                    |
| Parapoxvirus                                  | n.d.                                                    | negative                                     |                 | n.d.                                      |                    |
| <b>Blood test s</b>                           |                                                         |                                              |                 |                                           |                    |
| <i>serology</i>                               |                                                         |                                              |                 |                                           |                    |
| Borrelia burgdorferi ELISA                    | negative                                                | n.d.                                         |                 | negative                                  |                    |
| Borrelia burgdorferi Western Blot             | negative                                                | n.d.                                         |                 | negative                                  |                    |
| <i>PCR</i>                                    |                                                         |                                              |                 |                                           |                    |
| HBV                                           | n.d.                                                    | negative                                     |                 | n.d.                                      |                    |
| HCV                                           | n.d.                                                    | negative                                     |                 | n.d.                                      |                    |
| HIV                                           | negative                                                | negative                                     |                 | n.d.                                      |                    |
| CMV                                           | negative                                                | negative                                     |                 | negative                                  |                    |
| EBV                                           | intermittently positive with undulating low copy number | intermittently positive with low copy number |                 | intermittently positive with low copy nb. |                    |
| HHV-6                                         | intermittently positive with low copy number            | intermittently positive with low copy number |                 | negative                                  |                    |
| HSV-1/2                                       | n.d.                                                    | negative                                     |                 | n.d.                                      |                    |
| Parvovirus B19                                | negative                                                | n.d.                                         |                 | negative                                  |                    |
| Adenovirus                                    | negative                                                | n.d.                                         |                 | negative                                  |                    |

**Supplemental Table 3** Familial distribution of *RAG* mutations

|                    | <b>gene</b> | <b>allele 1 (mother)</b> | <b>allele 2 (father)</b> |
|--------------------|-------------|--------------------------|--------------------------|
| <b>Patient 1</b>   | RAG1        | R314W                    | R507W/R737H              |
| <b>Patient 2*</b>  | RAG1        | R778Q or R975W *         | R778Q or R975W *         |
| <b>Patient 3**</b> | RAG2        | G451A                    | T77N                     |

\* *RAG* Genotype of the parents of patient 2 and sibling of patient 2 was not determined

\*\* *RAG* Genotype of the half siblings of patient3 was not determined

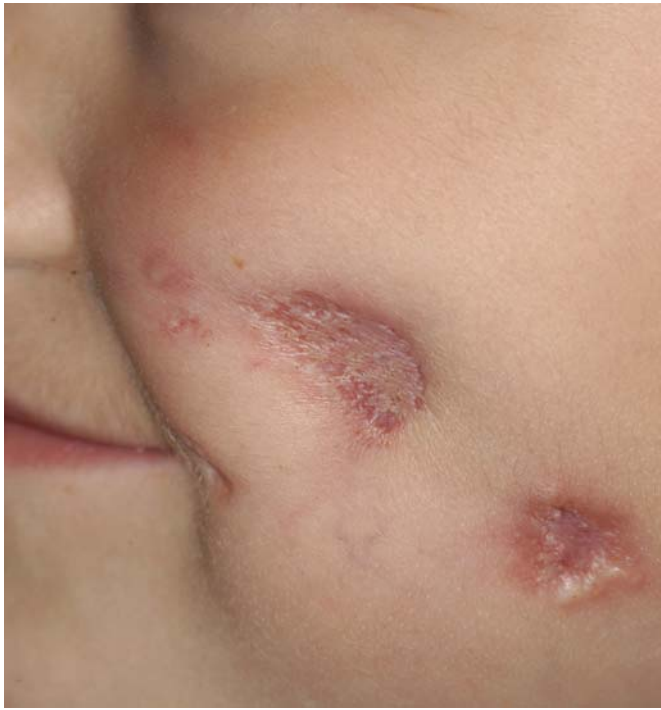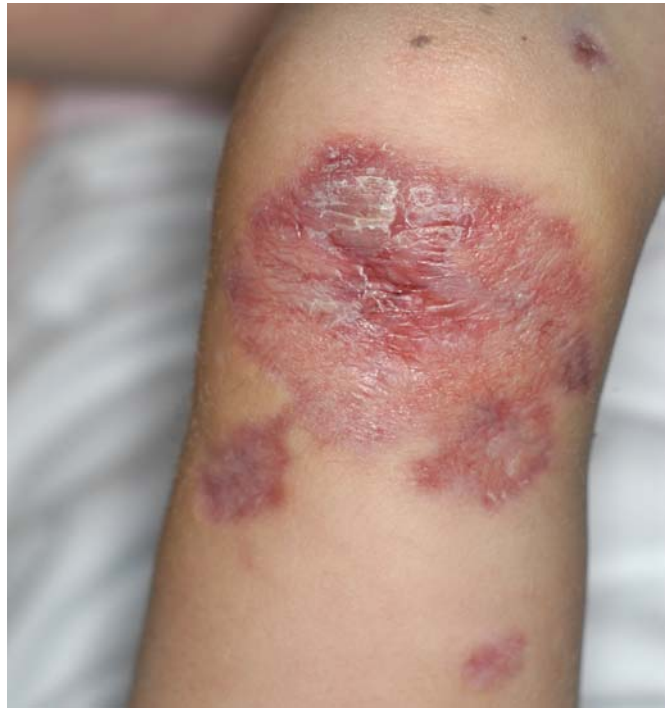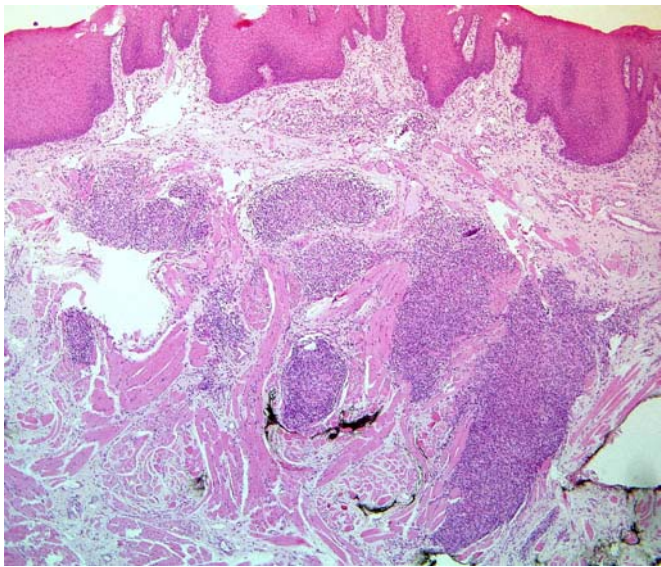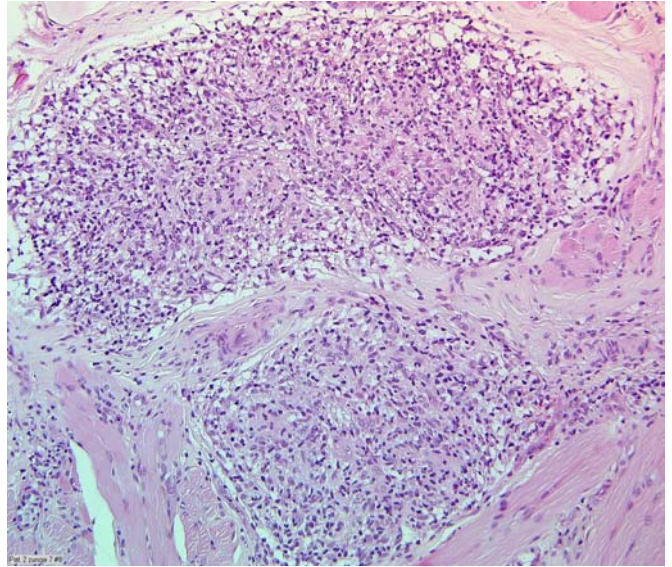

**Figure 1 b.** Upper panel: skin ulcerations of face and left knee in patient 2 without inflammatory activity showing skin contraction through scarring

**Figure 1 b.** Lower panel: Histopathology of tongue lesion in patient 2 showing nodular collections of epithelioid cells (left) surrounded by moderately dense lymphocytic infiltrate with some neutrophils (right). No necrosis was present.

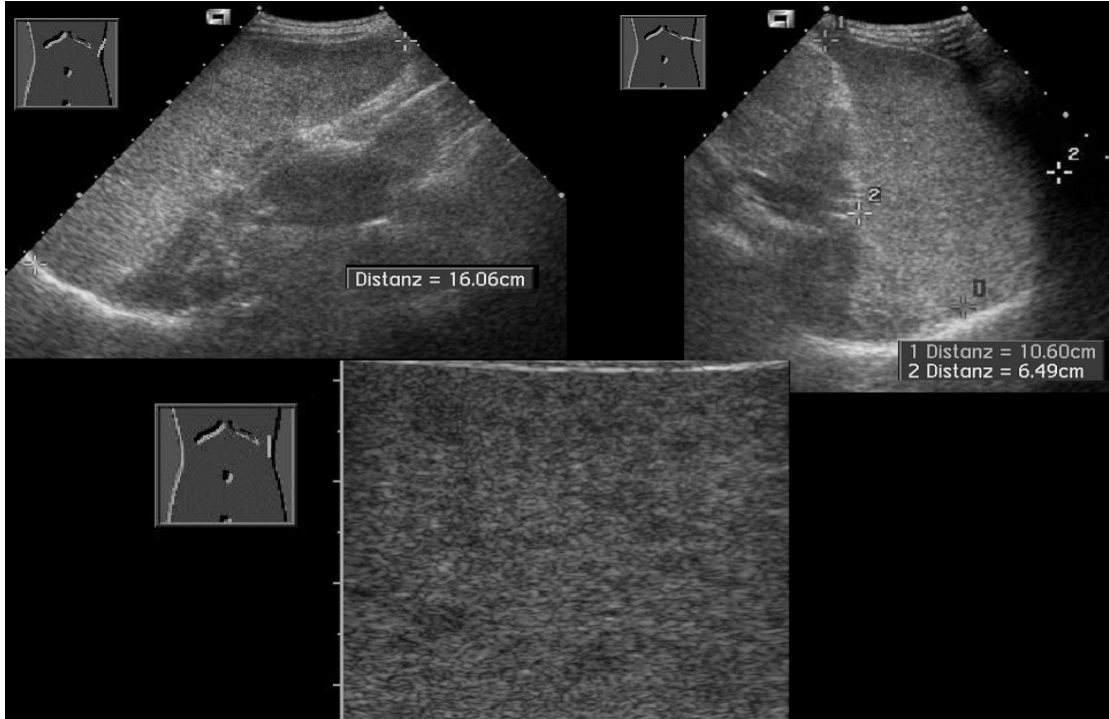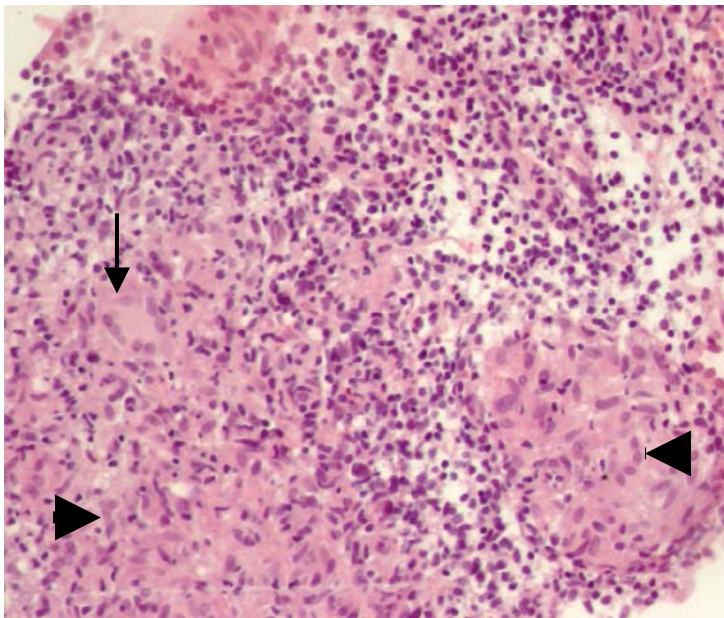

**Figure 1c.** Upper panel: Ultrasound of the spleen in *patient 3*: upper row left: longitudinal view, on the right transversal view; zoomed image taken with a linear array: gross enlargement of the spleen with a diffuse spread of small hypoechoic lesions.

**Figure 1 c.** Lower panel: Histopathology of spleen lesion showing nodular collections of epithelioid cells (arrows heads) surrounded by lymphocytic infiltrate with some neutrophils. Some of the epithelioid cells are multinucleated (arrow).
